# Supplementary material
Source: Research Square preprint supplement (doi:10.21203/rs.3.rs-9802727/v1)
Supplement: Supplementary file 1 [file 2a9db547b455639e88c05fd7.docx]

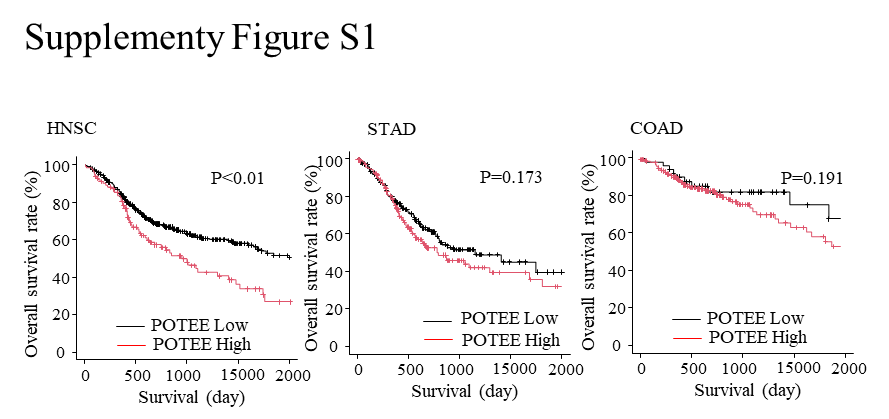


**Supplementary Figure 1.**

Prognostic significance of POTEE mRNA expression in public datasets.

Kaplan–Meier curves showing overall survival according to POTEE mRNA expression levels in HNSC, STAD, and COAD. High POTEE expression was significantly associated with poor prognosis in HNSC, while non-significant trends toward poorer prognosis were observed in STAD and COAD.

| Supplement table I. List of 226 genes highly expressed in the testis, ovary, or placenta based on the Human Protein Atlas RNA tissue expression consensus dataset. | | | | | | | |
| --- | --- | --- | --- | --- | --- | --- | --- |
| AGEC2 | SPO11 | PAGE1 | FKBP6 | LRRC74A | SEL1L2 | H2BW2 | LUZP4 |
| CCDC70 | ESX1 | ATXN3L | MAGEA10 | BANF2 | SSX1 | QRICH2 | VCY1B |
| USP26 | PIWIL4 | GH2 | C4orf17 | PLCZ1 | SYCP3 | ADAM21 | DMRTC2 |
| ALLC | SLC25A31 | CATSPER3 | TEKT5 | FAM81B | TEX29 | TRIM42 | MAGEA8 |
| TEX47 | LRRC18 | RPL10L | NOXRED1 | SSX3 | PASD1 | TBATA | SUN5 |
| GARIN2 | CBY2 | C9orf131 | ARL13A | GOLGA6L2 | TEX36 | CATSPER1 | CCDC197 |
| BEND2 | C12orf54 | SPATA31E1 | PRM3 | ZNF716 | SPDYE4 | REC114 | TFDP3 |
| FAM47A | NPAP1 | SLC36A3 | CCDC73 | H2AP | NANOS3 | DNAH17 | FAM205C |
| HBG2 | TEX43 | OR8G1 | CLEC9A | FAM24A | DPPA5 | C1orf146 | SPANXN1 |
| C16orf96 | C18orf63 | CTAGE1 | TSGA13 | MAGEB1 | DCDC2C | PNMA6E | C16orf90 |
| SPANXB1 | TEX46 | C2orf92 | TSPY8 | IQCF3 | TEX50 | PAGE2 | CCDC188 |
| TEX49 | ENSG00000259060 | GFY | SSX4 | SSX2B | CT45A1 | MEI4 | TMEM275 |
| ADAM2 | THEG | SPAM1 | SLC25A2 | TEX11 | LYZL1 | RGSL1 | IQCM |
| ZSCAN10 | CDX4 | RHOXF2 | LIN28A | FTHL17 | LARGE1 | ADAM30 | TEX52 |
| ZAN | GCNA | ANKRD30A | OOSP2 | SPATA25 | CCDC83 | LYZL2 | MEIOSIN |
| LYZL4 | HIPK4 | DPPA2 | DNAJC5G | C4orf45 | PRDM9 | SPATA48 | LITAFD |
| C16orf92 | GOT1L1 | USP50 | XAGE3 | XAGE5 | KLF17 | TEX37 | ZNF722 |
| TMEM270 | ENTHD1 | FOXR1 | DCAF4L2 | CNBD1 | TRIM60 | FMR1NB | THSD8 |
| PP2D1 | NUTM1 | PRSS55 | DDX53 | C5orf47 | ZNF479 | TEX33 | ERVW-1 |
| TMEM202 | POTEE | NANOS2 | POTEA | DUSP21 | DCAF8L2 | OTUD6A | ENSG00000284526 |
| TXNDC8 | SPANXN5 | CBY3 | FAM221B | MS4A13 | FAM205A | IZUMO3 | GMCL2 |
| KCNU1 | CDC14C | MAGEA3 | POM121L12 | SUPT20HL2 | C8orf90 | MROH5 | SMIM42 |
| TERB1 | ARMS2 |  |  |  |  |  |  |
| These genes showed significantly higher expression in the testis, ovary, or placenta than in other tissues (t-test P<0.05 and fold change >20), with no detectable expression in 95% of the remaining tissues. | | | | | | | |

| Supplement table II. Fifteen genes with high commonality in tumor tissues of HNSC, STAD, READ, and COAD. | | | | |
| --- | --- | --- | --- | --- |
| Gene name | HNSC(%) | STAD(%) | READ(%) | COAD(%) |
| C20orf144 | 99.2 | 99.7 | 100 | 98.2 |
| DYNLT2 | 100 | 99.7 | 100 | 99.5 |
| TMEM262 | 100 | 99.7 | 100 | 99.8 |
| ACTL8 | 86.8 | 88.2 | 97.5 | 96.8 |
| AKNAD1 | 97.6 | 95.2 | 96.9 | 93.6 |
| ERICH6B | 92.8 | 97.7 | 96.9 | 95.4 |
| C11orf94 | 96.4 | 94.1 | 88.1 | 82.7 |
| PPP1R2B | 85.4 | 99.4 | 84.3 | 77.4 |
| C1orf100 | 86.8 | 93.2 | 82.4 | 76.1 |
| CAGE1 | 99.4 | 85.6 | 82.4 | 75.9 |
| CSTL1 | 82.8 | 81.4 | 81.1 | 82.2 |
| **POTEE** | **90.8** | **99.7** | **79.2** | **69** |
| TEX19 | 80 | 77.2 | 76.7 | 77.7 |
| MMP20 | 70.5 | 74.9 | 75.5 | 70.8 |
| CCDC168 | 91.4 | 97.2 | 69.8 | 71.8 |
| The table lists 15 genes showing high commonality in tumor tissues of HNSC, STAD, READ, and COAD, defined as expression in tumor tissues in more than 60% of cases for each cancer type. HNSC, head and neck squamous cell carcinoma; STAD, stomach adenocarcinoma; READ, rectal adenocarcinoma; COAD, colon adenocarcinoma. | | | | |
